# Supplementary material for: Probenecid Inhibits Respiratory Syncytial Virus (RSV) Replication
Source: MDPI journal article supplement (doi:10.3390/v14050912), 2022-04-27
Supplement: s1 [file s1]

Supplementary Materials

# Probenecid Inhibits Respiratory Syncytial Virus (RSV) Replication

Jackelyn Murray <sup>1</sup>, Harrison C. Bergeron <sup>1</sup>, Les P. Jones <sup>1</sup>, Zachary Beau Reener<sup>1</sup>, David E. Martin <sup>2</sup>, Fred D. Sancilio <sup>3</sup> and Ralph A. Tripp <sup>1,2,\*</sup>

**Table S1.** OAT3 Expression.

| HEp-2 Cells      | Probenecid Treated             | DMSO only               |
|------------------|--------------------------------|-------------------------|
|                  | Raw Ct Value                   | Raw Ct Value            |
| ACTB             | 16.3 (95% CI 14.8-17.8)        | 15.3 (95% CI 14.4-16.2) |
| OAT3             | No Ct                          | 32.1 (95% CI 31.2-33)   |
| BALB/c Mice      | Probenecid Treated (200 mg/kg) |                         |
|                  | Fold change reduction          |                         |
| OAT3             | 15.6 (95% CI 3.8-27.4)         |                         |
| Paired Ct Values | Probenecid Treated             | PBS                     |
|                  | Raw Ct Value                   | Raw Ct Value            |
| ACTB             | 11.94                          | 11.10                   |
| OAT3             | 33.40                          | 31.26                   |
| ACTB             | 11.66                          | 11.65                   |
| OAT3             | 33.65                          | 30.38                   |
| ACTB             | 11.91                          | 11.70                   |
| OAT3             | 36.06                          | 30.72                   |
| ACTB             | 14.5                           | 13                      |
| OAT3             | 37                             | 31                      |

HEp-2 cells were treated with IC<sub>50</sub> concentration of probenecid [7.2uM] or mock treated (DMSO only) for 24h. OAT3 transcripts were determined as described in Methods. Since probenecid treatment resulted in undetectable levels of OAT3 transcripts, fold-change was not performed. Lung RNA was extracted at day 2 pi in mice treated with 200 mg/kg probenecid or PBS (i.e., 24h post treatment). OAT3 gene expression in 200 mg/kg probenecid treated mice was normalized to a house-keeping gene, ACTB (the gene for beta (β)-actin) which is an endogenous control and compared to PBS treated mice. The data is represented as the reciprocal of 2<sup>ΔΔCt</sup> (fold-change decrease). Mean paired Ct values are included for ACTB and OAT3. Data represent the mean Ct values or fold-change of three individual experiments and 95% confidence intervals (CI).

**Table S2.** BAL cells.

A. BAL cells/mL.

| Sex     | Group                 | BAL cells/mL + (SD) |          |          |          |          |          |
|---------|-----------------------|---------------------|----------|----------|----------|----------|----------|
|         |                       | Day 3               |          | Day 5    |          | Day 7    |          |
| Males   | Prophylactic 2mg/kg   | 1.25E+05            | 3.23E+04 | 1.19E+05 | 3.06E+04 | 1.31E+04 | 3.75E+03 |
|         | Prophylactic 200mg/kg | 2.44E+05            | 9.91E+04 | 2.94E+05 | 5.00E+04 | 1.31E+04 | 5.15E+03 |
|         | Treatment 2mg/kg      | 1.94E+05            | 8.91E+04 | 1.20E+05 | 5.18E+04 | 1.75E+04 | 9.84E+03 |
|         | Treatment 200mg/kg    | 2.65E+05            | 8.48E+04 | 1.45E+05 | 5.18E+04 | 1.94E+04 | 8.51E+03 |
|         | PBS                   | 2.44E+05            | 2.39E+04 | 1.00E+05 | 3.06E+04 | 1.95E+04 | 7.98E+03 |
| Females | Prophylactic 2mg/kg   | 2.69E+05            | 1.32E+05 | 2.56E+05 | 5.76E+04 | 7.50E+04 | 1.22E+05 |
|         | Prophylactic 200mg/kg | 3.08E+05            | 1.26E+05 | 2.80E+05 | 6.75E+04 | 1.25E+05 | 7.71E+04 |
|         | Treatment 2mg/kg      | 3.60E+05            | 1.40E+05 | 2.70E+05 | 6.94E+04 | 1.35E+05 | 8.91E+04 |
|         | Treatment 200mg/kg    | 3.13E+05            | 1.39E+05 | 1.40E+05 | 1.16E+05 | 9.17E+04 | 3.79E+04 |
|         | PBS                   | 2.35E+05            | 1.01E+05 | 1.70E+05 | 1.02E+05 | 2.50E+05 | 1.05E+05 |

## B. BAL cells types.

| Sex   | DPI | Cell Type   | Total BAL cells (SD) |          |                       |          |                  |          |                    |          |          |          |
|-------|-----|-------------|----------------------|----------|-----------------------|----------|------------------|----------|--------------------|----------|----------|----------|
|       |     |             | Prophylactic 2mg/kg  |          | Prophylactic 200mg/kg |          | Treatment 2mg/kg |          | Treatment 200mg/kg |          | PBS      |          |
| Males | 3   | Macrophages | 3.06E+04             | 7.12E+03 | 7.05E+04              | 5.65E+04 | 3.79E+04         | 1.67E+04 | 4.22E+04           | 1.45E+04 | 4.87E+04 | 5.36E+03 |
|       |     | Lymphocytes | 5.67E+02             | 4.93E+02 | 1.38E+03              | 1.04E+03 | 7.88E+02         | 5.17E+02 | 9.63E+02           | 4.85E+02 | 4.67E+02 | 4.51E+02 |
|       |     | Neutrophils | 4.00E+02             | 1.00E+02 | 1.08E+03              | 1.37E+03 | 0.00E+00         | 0.00E+00 | 6.25E+02           | 2.63E+02 | 1.83E+02 | 3.18E+02 |
|       |     | Eosinophils | 1.33E+02             | 2.31E+02 | 8.00E+01              | 1.79E+02 | 1.38E+02         | 1.89E+02 | 0.00E+00           | 0.00E+00 | 6.50E+02 | 2.18E+02 |
|       | 5   | Macrophages | 2.15E+04             | 1.16E+04 | 5.66E+04              | 3.39E+04 | 2.66E+04         | 1.30E+04 | 2.92E+04           | 1.16E+04 | 1.92E+04 | 6.21E+03 |
|       |     | Lymphocytes | 3.90E+02             | 3.75E+02 | 1.25E+03              | 7.58E+02 | 3.63E+02         | 1.25E+02 | 2.38E+02           | 2.10E+02 | 4.60E+02 | 1.95E+02 |
|       |     | Neutrophils | 0.00E+00             | 0.00E+00 | 4.63E+02              | 8.28E+02 | 4.25E+02         | 2.50E+02 | 4.63E+02           | 3.13E+02 | 2.10E+02 | 1.52E+02 |
|       |     | Eosinophils | 8.00E+01             | 1.00E+02 | 4.38E+02              | 5.06E+02 | 1.13E+02         | 1.65E+02 | 1.50E+02           | 1.60E+02 | 1.00E+02 | 9.35E+01 |
|       | 7   | Macrophages | 1.66E+04             | 1.13E+04 | 1.27E+04              | 5.10E+03 | 1.66E+04         | 1.08E+04 | 1.75E+04           | 7.41E+03 | 1.86E+04 | 7.92E+03 |
|       |     | Lymphocytes | 6.75E+02             | 5.44E+02 | 2.06E+02              | 1.18E+02 | 4.50E+02         | 4.22E+02 | 1.45E+03           | 1.83E+03 | 6.30E+02 | 3.93E+02 |

|         |   |             |          |          |          |          |          |          |          |          |          |          |
|---------|---|-------------|----------|----------|----------|----------|----------|----------|----------|----------|----------|----------|
| Females | 3 | Neutrophils | 3.00E+01 | 7.50E+01 | 4.38E+01 | 8.75E+01 | 8.13E+01 | 1.63E+02 | 6.88E+01 | 1.38E+02 | 2.00E+01 | 4.47E+01 |
|         |   | Eosinophils | 0.00E+00 |
|         | 5 | Macrophages | 6.89E+04 | 4.04E+04 | 7.71E+04 | 2.67E+04 | 4.40E+04 | 2.24E+04 | 5.71E+04 | 3.56E+04 | 5.11E+04 | 2.66E+04 |
|         |   | Lymphocytes | 2.38E+03 | 1.77E+03 | 2.10E+03 | 1.27E+03 | 4.88E+02 | 5.39E+02 | 1.20E+03 | 7.55E+02 | 1.35E+03 | 1.03E+03 |
|         |   | Neutrophils | 1.30E+02 | 0.00E+00 | 3.00E+02 | 4.24E+02 | 4.88E+02 | 8.78E+02 | 1.13E+03 | 1.30E+03 | 6.00E+02 | 8.22E+02 |
|         |   | Eosinophils | 5.40E+02 | 5.34E+02 | 5.00E+02 | 7.07E+02 | 0.00E+00 | 0.00E+00 | 6.00E+02 | 3.77E+02 | 0.00E+00 | 0.00E+00 |
|         | 7 | Macrophages | 5.22E+04 | 2.11E+04 | 5.49E+04 | 3.23E+04 | 3.45E+04 | 2.11E+04 | 3.05E+04 | 8.33E+03 | 5.18E+04 | 1.96E+04 |
|         |   | Lymphocytes | 1.45E+03 | 7.68E+02 | 8.50E+02 | 3.66E+02 | 1.20E+03 | 1.04E+03 | 4.63E+02 | 3.04E+02 | 1.80E+03 | 1.07E+03 |
|         |   | Neutrophils | 0.00E+00 | 0.00E+00 | 9.00E+01 | 2.01E+02 | 3.75E+02 | 6.24E+02 | 7.50E+01 | 1.50E+02 | 2.80E+02 | 3.90E+02 |
|         |   | Eosinophils | 3.30E+02 | 4.50E+02 | 1.70E+02 | 3.80E+02 | 1.63E+02 | 3.25E+02 | 2.50E+02 | 3.79E+02 | 1.60E+02 | 3.58E+02 |
|         |   | Macrophages | 2.64E+04 | 1.38E+04 | 2.42E+04 | 2.44E+04 | 5.37E+04 | 1.99E+04 | 1.24E+04 | 1.03E+04 | 1.36E+04 | 4.05E+03 |

|             |          |          |          |          |          |          |          |          |          |          |
|-------------|----------|----------|----------|----------|----------|----------|----------|----------|----------|----------|
| Lymphocytes | 4.00E+02 | 3.11E+02 | 2.60E+02 | 2.88E+02 | 6.88E+02 | 3.42E+02 | 1.50E+02 | 1.73E+02 | 2.50E+02 | 3.24E+02 |
| Neutrophils | 1.00E+02 | 2.50E+02 | 3.70E+02 | 5.81E+02 | 1.38E+02 | 2.75E+02 | 0.00E+00 | 0.00E+00 | 1.30E+02 | 1.30E+02 |
| Eosinophils | 1.20E+02 | 2.50E+02 | 2.10E+02 | 2.79E+02 | 4.75E+02 | 5.62E+02 | 0.00E+00 | 0.00E+00 | 3.00E+01 | 6.71E+01 |

BAL cells were collected from male and female BALB/c mice (n>3/group) at days 3, 5, or 7 post-infection. (A) Cells were enumerated by hemocytometer and Trypan blue and presented as BAL cells/mL (+SD; *italics*). (B) A portion of BAL cells were cytopun onto glass slides, fixed with 4% paraformaldehyde, and stained with hematoxylin and eosin. At least 100 cells per slide were phenotyped based on morphology, and values represent total number of each cell type in the BAL (+SD, in *italics*). There were no significant differences between treatment groups compared to PBS control as determined by two-way ANOVA.
